# Supplementary material
Source: Elsevier journal article supplement (https://www.sciencedirect.com/science/article/pii/S1885585717304796)
Supplement: mmc1 [file S1885585717304796:mmc1.pdf]

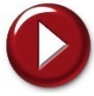

**Supplementary material**

---

**In-frame Variants in *FLNA* Proximal Rod 1 Domain Associate  
With a Predominant Cardiac Valvular Phenotype**

---

**Video 1 of the supplementary material.** Fetal 2D-echocardiography film of index patient (IV-1).

**Video 2 of the supplementary material.** Fetal 2D-echocardiography film of index patient (IV-1).

**Video 3 of the supplementary material.** Adult 2D-echocardiography film of individual III-4. Parasternal view at the level of the tricuspid and mitral valve, both showing severe degenerative disease.
